# Supplementary material for: Apple-Like Shape of Freezing Paraffin Wax Droplets and its Origin
Source: Preprints.org preprint supplement (doi:10.20944/preprints202307.1035.v1), 2023-07-17
Supplement: Supplementary file 1 [file Supplementary Materials.docx]

**Supplementary Materials**


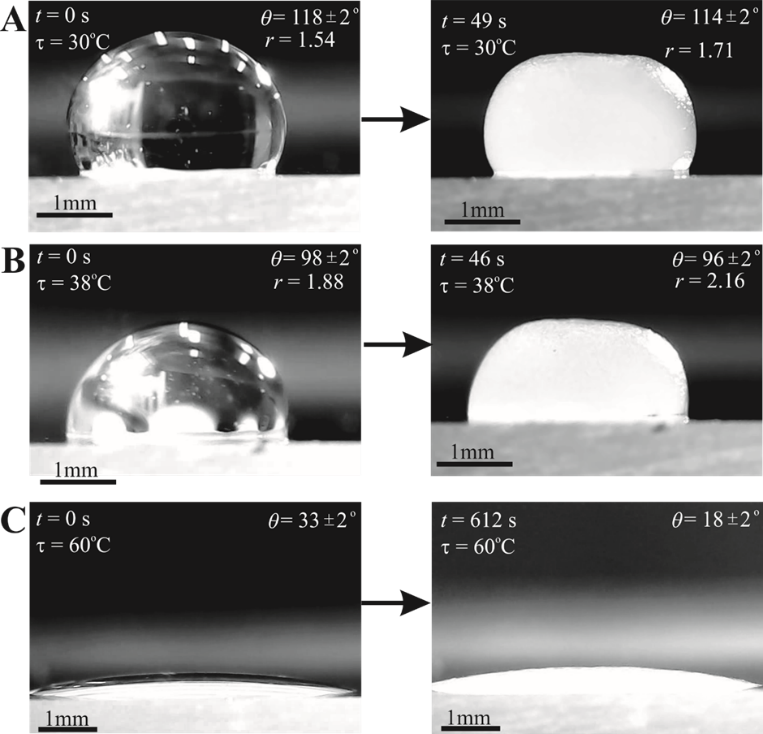


Figure S 2 Effect of substrate temperature on molten wax wetting behavior. Images of 10 µl paraffin wax droplets placed on a slide at different temperatures: (A) 30 ℃, (B) 38 ℃, (C) 60 ℃.


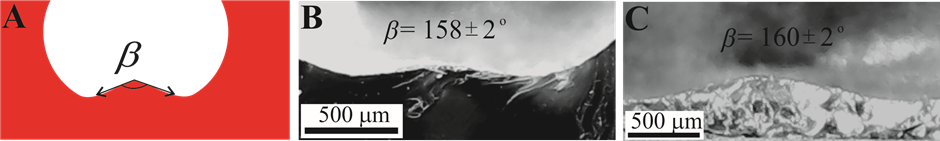


Figure S 1 Opening angle. Images of the opening dimple angle (A) schematic, (B) replica taken from 10 µl paraffin wax droplet, (C) replica taken from 50 µl droplet.


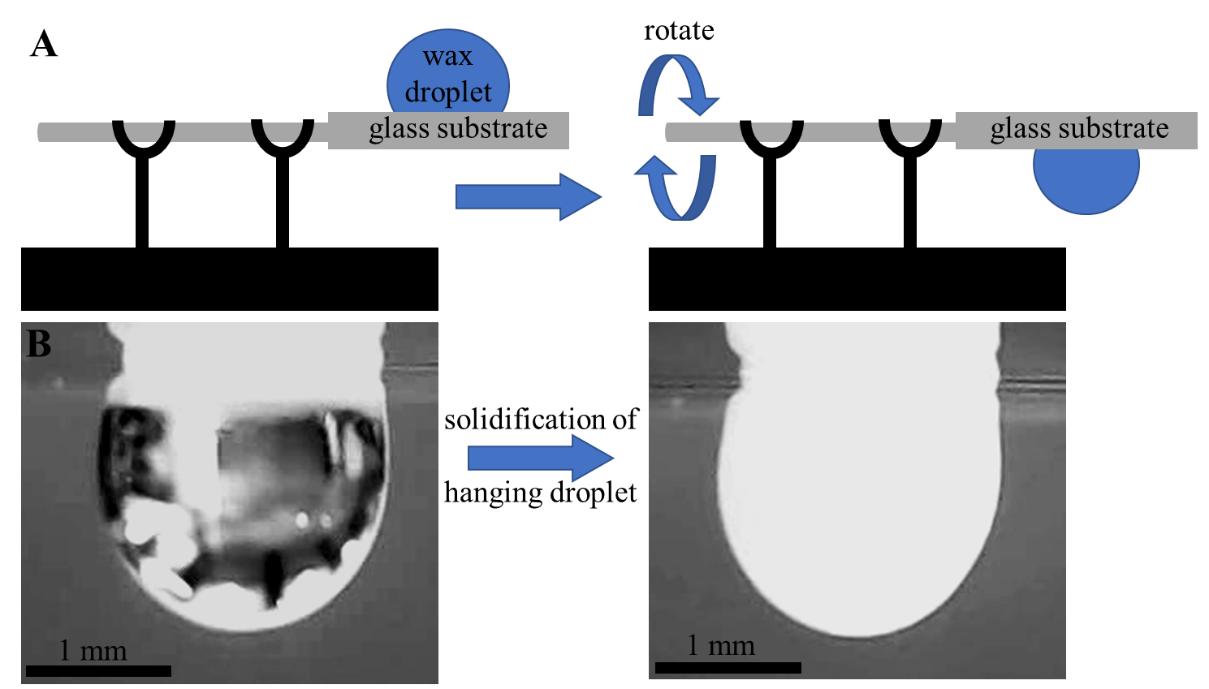


Figure S 3 Effect of gravity on droplet freezing. (A) Schematic representation of the experimental setup. (B) Images of a 10 µl paraffin wax droplet before and after solidification hanging from a glass substrate at τsub=22 ℃.


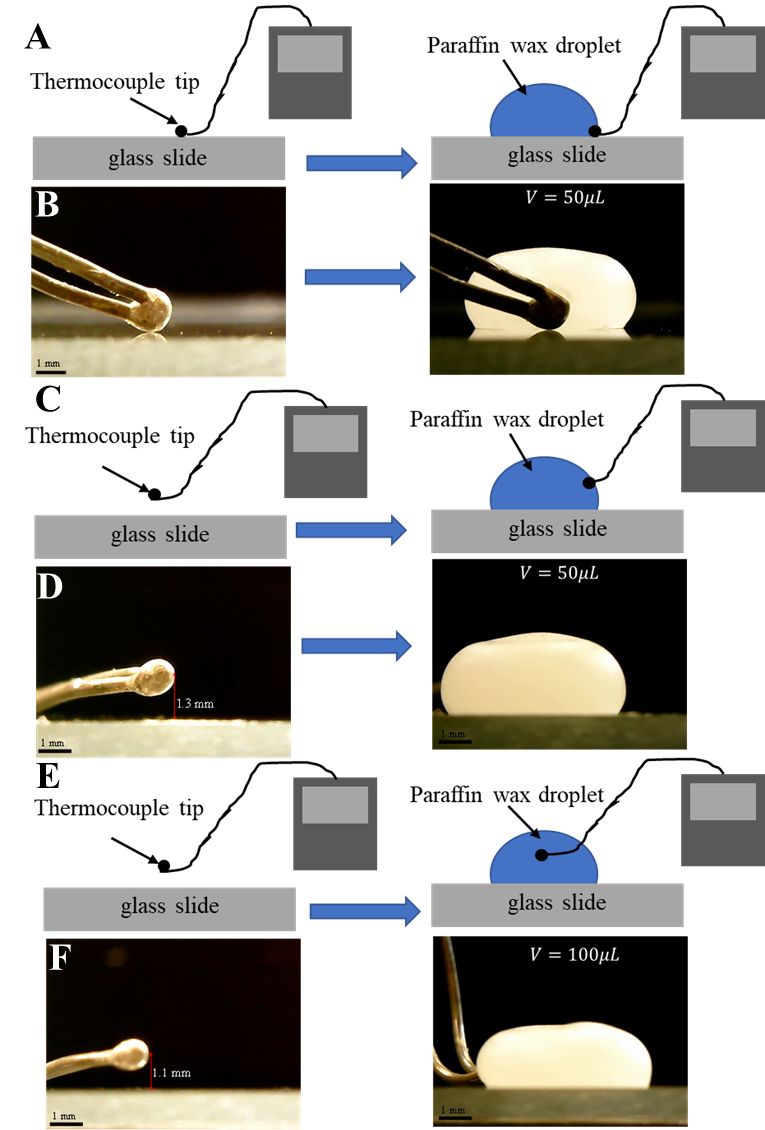


Figure S 4 Thermocouple measurements of the droplet surface temperature. Schematic (A) and image (B) represent the thermocouple tip placed at the three-phase contact line (air/glass/paraffin). Schematic (C) and image (D) represent the thermocouple tip at the air/paraffin interface. Schematic (**E**) and image (**F**) show that the thermocouple tip is surrounded by paraffin wax (near the center of the droplet).


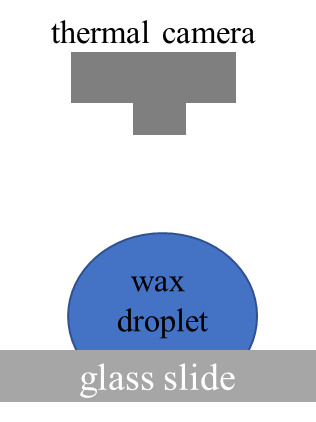


Figure S 5 Schematics of pyrometric temperature measurements.

**Supplementary Files**

- **Video 1S.** Side view of a deforming and solidifying 10 µl paraffin wax droplet.
- **Video 2S**. Side view of a deforming and solidifying 20 µl paraffin wax droplet.
- **Video 3S**. Side view of a deforming and solidifying 50 µl paraffin wax droplet.
- **Video 4S**. Side view of a deforming and solidifying 10 µl paraffin wax droplet hanging upside down from a glass substrate.
- **Video 5S**. Time variation of infrared image of the paraffin wax droplet. 50 µl droplet, view from above, speed 7X.
